# Supplementary material for: MET Oncogene Enhances Pro-Migratory Functions by Counteracting NMDAR2B Cleavage
Source: MDPI journal article supplement (doi:10.3390/cells13010028), 2023-12-21
Supplement: s1 [file s1]

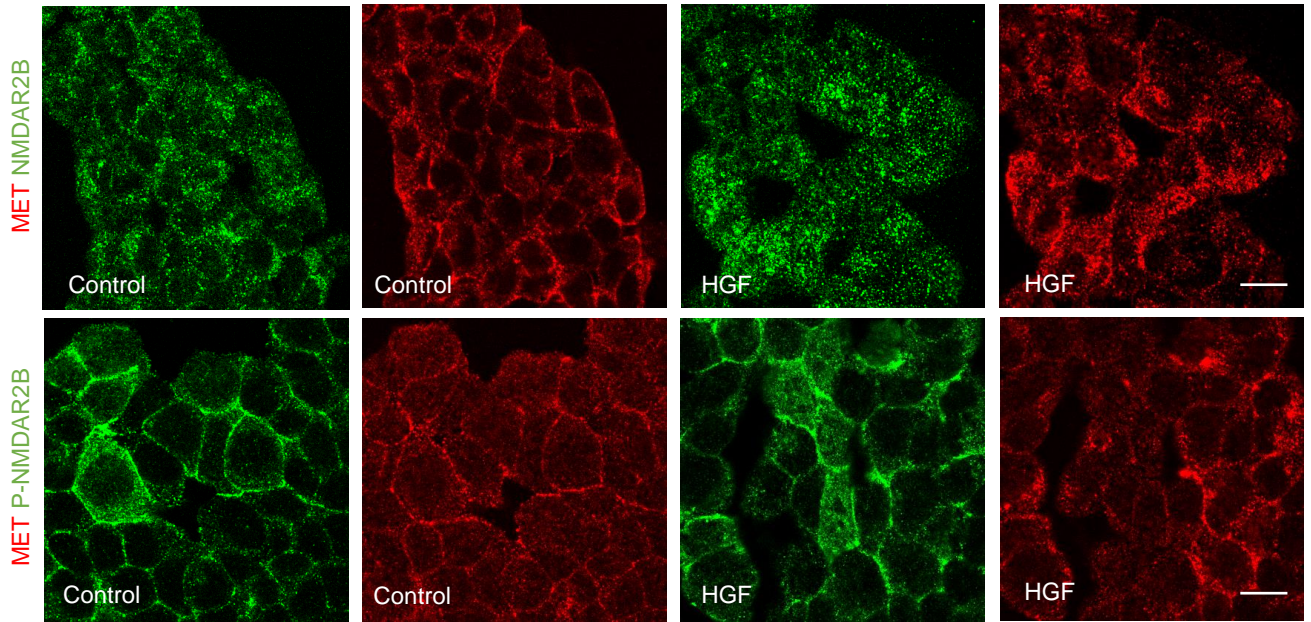

**Supplementary Figure S1.** Single-channel images for MET (red) and total (upper panels) or phosphorylated (Tyr1252, lower panels) NMDAR2B (green) proteins from the merged confocal double immunofluorescence shown in Figure 1a. Bar = 50  $\mu$ m.

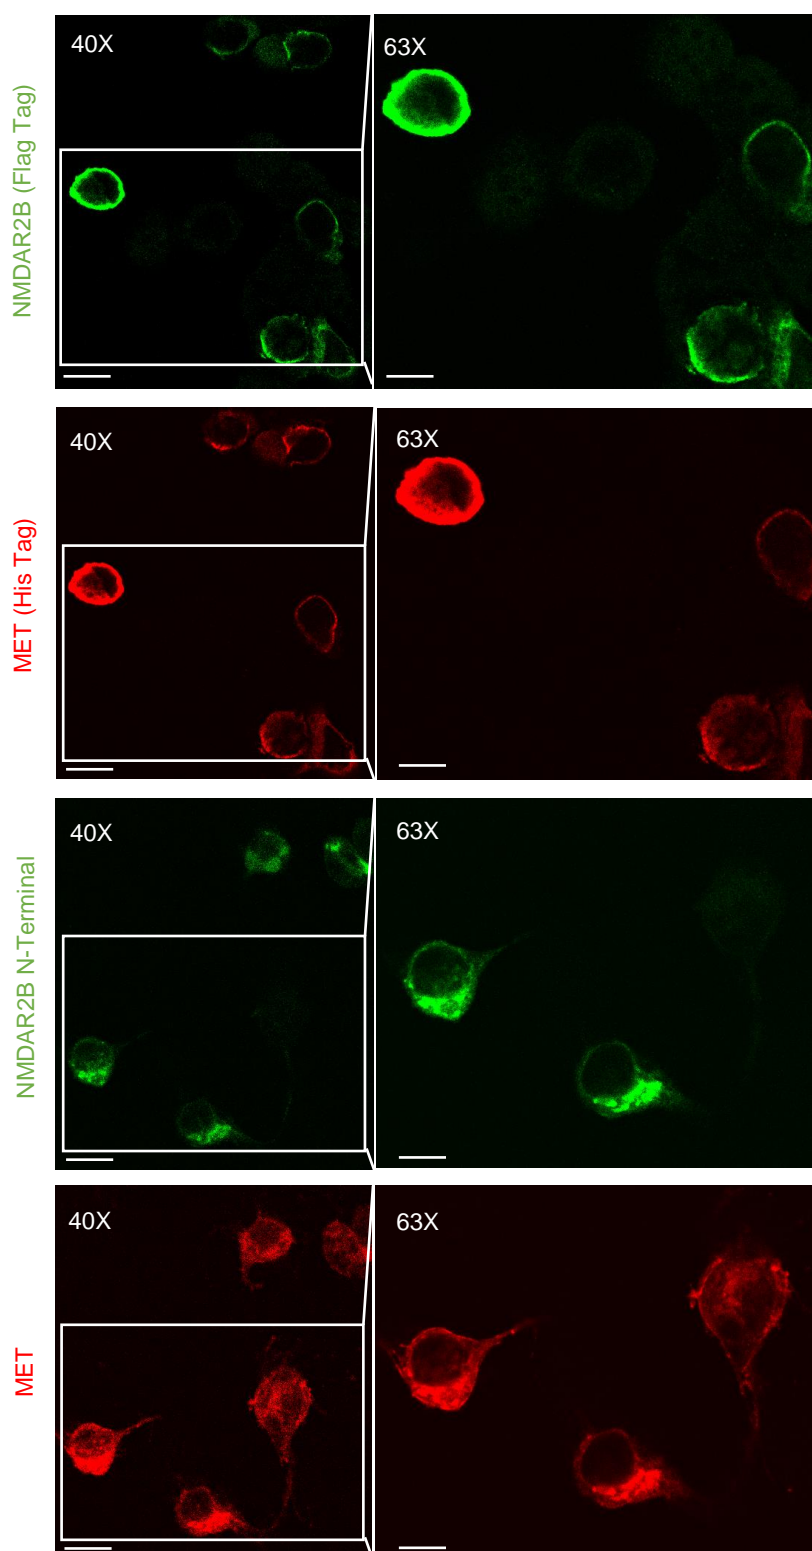

**Supplementary Figure S2.** Single-channel images from the merged confocal double immunofluorescence shown in Figure 2c. Anti-Flag (NMDAR2B, green); anti-His (MET, red); anti-N-terminal NMDAR2B (green); anti-MET (red) antibodies. Images were taken by two enlargements (40 and 63X). Bar 40X = 50  $\mu$ m, Bar 63X = 80  $\mu$ m.

| Coordinate | Analyte                 | Entrex Gene ID                     | Coordinate | Analyte                           | Entrex Gene ID |
|------------|-------------------------|------------------------------------|------------|-----------------------------------|----------------|
| A1, A2     | Reference Spots         | N/A                                | E1, E2     | CXCL8/IL-8                        | 3576           |
| A3, A4     | $\alpha$ -Fetoprotein   | 174                                | E3, E4     | IL-18 BP $\alpha$                 | 10068          |
| A5, A6     | Amphiregulin            | 374                                | E5, E6     | Kallikrein 3/PSA                  | 354            |
| A7, A8     | Angiopoietin-1          | 284                                | E7, E8     | Kallikrein 5                      | 25818          |
| A9, A10    | Angiopoietin-like 4     | 51129                              | E9, E10    | Kallikrein 6                      | 5653           |
| A11, A12   | ENPP-2/Autotaxin        | 5168                               | E11, E12   | Leptin                            | 3952           |
| A13, A14   | Axl                     | 558                                | E13, E14   | Lumican                           | 4060           |
| A15, A16   | BCL-x                   | 598                                | E15, E16   | CCL2/MCP-1                        | 6347           |
| A17, A18   | CA125/MUC16             | 94025                              | E17, E18   | CCL8/MCP-2                        | 6355           |
| A19, A20   | E-Cadherin              | 999                                | E19, E20   | CCL7/MCP-3                        | 6354           |
| A21, A22   | VE-Cadherin             | 1003                               | E21, E22   | M-CSF                             | 1435           |
| A23, A24   | Reference Spots         | N/A                                | E23, E24   | Mesothelin                        | 10232          |
| B3, B4     | CapG                    | 822                                | F1, F2     | CCL3/MIP-1 $\alpha$               | 6348/6351      |
| B5, B6     | Carbonic Anhydrase IX   | 768                                | F3, F4     | CCL20/MIP-3 $\alpha$              | 6364           |
| B7, B8     | Cathepsin B             | 1508                               | F5, F6     | MMP-2                             | 4313           |
| B9, B10    | Cathepsin D             | 1509                               | F7, F8     | MMP-3                             | 4314           |
| B11, B12   | Cathepsin S             | 1520                               | F9, F10    | MMP-9                             | 4318           |
| B13, B14   | CEACAM-5                | 1048                               | F11, F12   | MSP/MST1                          | 4485           |
| B15, B16   | Decorin                 | 1634                               | F13, F14   | MUC-1                             | 4582           |
| B17, B18   | Dkk-1                   | 22943                              | F15, F16   | Nectin-4                          | 81607          |
| B19, B20   | DLL1                    | 28514                              | F17, F18   | Osteopontin                       | 6696           |
| B21, B22   | EGF R/ErbB1             | 1956                               | F19, F20   | p27/Kip1                          | 1027           |
| C3, C4     | Endoglin/CD105          | 2022                               | F21, F22   | p53                               | 7157           |
| C5, C6     | Endostatin              | 80781                              | F23, F24   | PDGF-AA                           | 5154           |
| C7, C8     | Enolase 2               | 2026                               | G1, G2     | CD31/PECAM-1                      | 5175           |
| C9, C10    | eNOS                    | 4846                               | G3, G4     | Progesterone R/NR3C3              | 5241           |
| C11, C12   | EpCAM/TROP1             | 4072                               | G5, G6     | Progranulin                       | 2896           |
| C13, C14   | Era/NR3A1               | 2099                               | G7, G8     | Prolactin                         | 5617           |
| C15, C16   | ErbB2                   | 2064                               | G9, G10    | Prostasin/Prss8                   | 5652           |
| C17, C18   | ErbB3/Her3              | 2065                               | G11, G12   | E-Selectin/CD62E                  | 6401           |
| C19, C20   | ErbB4                   | 2066                               | G13, G14   | Serpin B5/Maspin                  | 5268           |
| C21, C22   | FGF basic               | 2247                               | G15, G16   | Serpin E1/PAI-1                   | 5054           |
| D1, D2     | FoxC2                   | 2303                               | G17, G18   | Snail                             | 6615           |
| D3, D4     | FoxO1/FKHR              | 2308                               | G19, G20   | SPARC                             | 6678           |
| D5, D6     | Galectin-3              | 3958                               | G21, G22   | Survivin                          | 332            |
| D7, D8     | GM-CSF                  | 1437                               | G23, G24   | Tenascin C                        | 3371           |
| D9, D10    | CG $\alpha/\beta$ (HCG) | 1081 ( $\alpha$ )/1082 ( $\beta$ ) | H1, H2     | Thrombospondin-1                  | 7057           |
| D11, D12   | HGF R/c-Met             | 4233                               | H3, H4     | Tie-2                             | 7010           |
| D13, D14   | HIF-1 $\alpha$          | 3091                               | H5, H6     | u-Plasminogen Activator/Urokinase | 5328           |
| D15, D16   | HNF-3 $\beta$           | 3170                               | H7, H8     | VCAM-1/CD106                      | 7412           |
| D17, D18   | HO-1/HMOX1              | 3162                               | H9, H10    | VEGF                              | 7422           |
| D19, D20   | ICAM-1/CD54             | 3383                               | H11, H12   | Vimentin                          | 7431           |
| D21, D22   | IL-2 R $\alpha$         | 3559                               | I1, I2     | Reference Spots                   | N/A            |
| D23, D24   | IL-6                    | 3569                               | I23, I24   | Negative Control                  | N/A            |

**Table S1.** Scheme of the human oncology proteins antibody arrays used in the work. Human XL Oncology Array allow to analyze 84 cancer-related proteins.

| Primary Antibody     | Company        | Product N.  | Experiment |
|----------------------|----------------|-------------|------------|
| NMDAR2B C-Terminal   | Abcam          | ab65783     | WB/IF      |
| P-NMDAR2B (Tyr1252)  | Invitrogen     | 48-5200     | WB/IF      |
| MET                  | R&D            | AF276       | IF         |
| MET                  | Cell Signaling | D1C2 - 8198 | WB         |
| P-MET (Tyr1234/1235) | Cell Signaling | 3077        | WB         |
| Tubulin              | SigmaAldrich   | 051M4771    | WB         |
| NMDAR2B N-Terminal   | Abcam          | ab93610     | WB         |
| His Tag              | R&D            | mab050      | IF         |
| Flag Tag             | SigmaAldrich   | F7425       | IF         |
| LC3B                 | SigmaAldrich   | L7543       | WB         |
| p70S6K               | Cell Signaling | 9202        | WB         |
| P-p70S6K (Thr389)    | Cell Signaling | 9205        | WB         |

**Table S2.** List of primary antibodies used throughout the study.
